# FACE MASKS TO PREVENT TRANSMISSION OF RESPIRATORY DISEASES: SYSTEMATIC REVIEW AND META-ANALYSIS OF RANDOMIZED CONTROLLED TRIALS\*

Hanna M. Ollila<sup>1,2,3</sup>, Markku Partinen<sup>4,5</sup>, Jukka Koskela<sup>1,2,6</sup>, Riikka Savolainen<sup>7</sup>, Anna Rotkirch<sup>8</sup>, and Liisa T. Laine<sup>9,10</sup>

<sup>1</sup>Institute for Molecular Medicine Finland (FIMM), University of Helsinki, Helsinki, Finland

<sup>2</sup>Broad Institute of MIT and Harvard, Cambridge, MA, USA

<sup>3</sup>Stanford University School of Medicine, Palo Alto, CA, USA

<sup>4</sup>Helsinki Sleep Clinic, Vitalmed Research Center

<sup>5</sup>Department of Clinical Neurosciences, Clinicum, University of Helsinki, Helsinki, Finland

<sup>1</sup>Institute for Molecular Medicine Finland (FIMM), University of Helsinki, Helsinki, Finland

<sup>2</sup>Broad Institute of MIT and Harvard, Cambridge, MA, USA

<sup>6</sup>Helsinki University and Helsinki University Hospital, Clinic of Gastroenterology Helsinki, Finland

<sup>7</sup>Newcastle University Business School, Newcastle-upon-Tyne, United Kingdom

<sup>8</sup>Population Research Institute, Väestöliitto – The Family Federation of Finland

<sup>9</sup>The Wharton School of the University of Pennsylvania, Philadelphia, PA, USA

<sup>10</sup>Department of Medical Ethics and Health Policy, The Perelman School of Medicine, Philadelphia, PA, USA

---

\*This version: December 2, 2020. Laine and Ollila gratefully acknowledge Academy of Finland for funding this research (Award number: 340551 LTL and 340539 HMO). Laine gratefully acknowledges funding from the National Institute on Aging of the National Institutes of Health under Award Number P30AG043073. The content is solely the responsibility of the authors and does not necessarily represent the official views of the National Institutes of Health, nor of the Academy of Finland. Corresponding authors: Hanna M. Ollila, FIMM-EMBL Group leader, Institute for Molecular Medicine Finland, University of Helsinki, Finland; [hanna.m.ollila@helsinki.fi](mailto:hanna.m.ollila@helsinki.fi) and Liisa T. Laine, Department of Medical Ethics and Health Policy, The Perelman School of Medicine, Philadelphia, PA, USA; [laine@wharton.upenn.edu](mailto:laine@wharton.upenn.edu)

## ABSTRACT

*Objective.* To examine the effect of face mask intervention in respiratory infections across different exposure settings and age groups.

*Design.* Systematic review and meta-analysis.

*Data sources.* PubMed, Cochrane Central Register of Controlled Trials (CENTRAL), and Web of Science were searched for randomized controlled trials investigating the effect of face masks on respiratory infections published by November 18th 2020. Our reporting follows the PRISMA guidelines.

*Eligibility criteria for selecting studies.* Randomized controlled trials investigating the effect of face masks in respiratory infections and influenza-like illness across different exposure settings and age groups. Two reviewers independently performed the search, extracted the data, and assessed the risk of bias. A random effects meta-analysis with risk ratio, risk difference, and number needed to treat were performed. Findings in exposure settings, age groups, and role of non-compliance were examined using a subgroup analysis.

*Results.* Total of 17 studies were included, with  $N = 11,601$  individuals in intervention and  $N = 10,286$  in the control group with follow-up duration from 4 days to 19 months). 14 trials included adults (and children) and 3 included children only. 12 studies suffered from non-compliance in the treatment arm and 11 in the control arm. All studies were intent-to-treat analyses, and, thus, non-compliance can bias individual intent-to-treat estimates towards zero. Four out of seventeen studies supported use of face masks. A meta-analysis of all 17 studies found no association between face mask intervention and respiratory infections ( $RR = 0.9046 [0.777 - 1.053]$ ,  $p = 0.196$ ,  $p$  fixed effect = 0.0006). However, a meta-analysis using odds ratios adjusted for age, sex, and vaccination (when available) suggests protective effect of the face mask intervention (17 studies,  $OR = 0.850 [0.736 - 0.982]$ ,  $p=0.027$ ). A subgroup meta-analysis among adults with (unadjusted) risk ratios found a decrease in respiratory infections (14 studies,  $RR = 0.859 [0.750 - 0.983]$ ,  $p = 0.026$ , and 4 studies with a combined face masks and hand hygiene intervention  $RR = 0.782 [0.696 - 0.879]$ ,  $p < 0.0001$ ). Finally, the face mask use is also supported by a meta-regression adjusting the effect estimates for non-compliance in the controls (17 studies  $RR = 0.87 [0.780 - 0.980]$ ,  $p = 0.017$ ).

*Conclusion.* Our findings support the use of face masks to prevent respiratory infections.

## 1 INTRODUCTION

The COVID-19 and other pandemics are a scourge causing severe losses on health, economy, and well-being [1, 2]. COVID-19, caused by SARS-CoV-2 (Severe Acute Respiratory Syndrome Coronavirus 2), can spread through droplet-mediated transmission through contaminated surfaces and air [3–6]. Non-pharmaceutical interventions (NPIs), such as maintaining physical distance, appropriate hand hygiene, and face masks have been adopted as the primary tools to limit the number of COVID-19 infections [7] while the vaccines are being developed and pharmaceuticals are studied for repurposing.

Prior to COVID-19 pandemic, the use of face masks by the general public was considered a relatively new policy tool in preventing person-to-person transmission on a global scale. Face masks are widely used in health care settings. Prediction models suggest that universal use of face masks in public may have a substantial preventive impact on disease spread, even without medical masks or 100% compliance [8–10]. In addition, a pooled meta-analysis of the spread of infectious viral diseases of up to 172 studies showed a consistent effect regarding the efficacy of face masks in preventing infections by SARS-CoV-2 and the betacoronaviruses that cause severe acute respiratory syndrome, and Middle East respiratory syndrome [7].

However, the most robust type of evidence on the efficacy of face masks use among the general public – that from randomized controlled trials – has been noted as being only suggestive.[11] For example, many of the randomized controlled trials have documented non-compliance either in the face mask intervention group [12–23] or in the control group [12, 15, 17, 18, 21, 23–28]. Because these studies estimate the intention-to-treat effect of face masks, non-compliance can underestimate the magnitude of the treatment effect of face masks use for a given randomized controlled trial.

The aim of this systematic review and meta-analysis was to examine the evidence from randomized controlled trials of face masks in the context of COVID-19 or diseases which spread through similar mechanisms to COVID-19: respiratory infections. An earlier systematic review and meta-analysis has investigated the effect of face masks by focusing on the use of cloth masks [29] in non-health care settings while [30] combined various types of studies, including RCTs, case-control studies and cohort studies. Our review complements these studies by focusing solely on randomized controlled trials in different exposure settings (hospital, household, and community) and age groups (adults vs. children). Moreover, we study the role of non-compliance in treatment and control groups and whether the results differ if the face mask use intervention included hand hygiene

guidance or not.

## 2 METHODS

This systematic review was performed according to the Preferred Reporting Items for Systematic Reviews and Meta-Analyses.[31] Our review protocol was registered on PROSPERO in November 2020 (registration number CRD42020205523).

### 2.1 SEARCH STRATEGY

We performed the searches using the Cochrane Central Register of Controlled Trials (CENTRAL), PubMed, and Web of Science (science and social science citation index). We performed the PubMed search using Medical Subject Headings (MeSH) listed in Supplement A. In other search engines, we used the following search terms: facemasks/face masks AND/OR infection. The full search protocol with the criteria are described in Supplement A. We limited the searches to randomized controlled trials on humans published by November 18th 2020. We did not limit the searches by language. The search results were uploaded on Endnote, and the unique citations were kept and screened.

### 2.2 STUDY SELECTION, INCLUSION AND EXCLUSION CRITERIA

We included randomized controlled trials on humans (general population and health care personnel in a risk of contracting respiratory infectious diseases) that compared face mask use (FFP1, FFP2, FFP3, cloth mask or surgical mask) or face mask and hand hygiene or face mask and education with no face mask use. We did not make exclusions based on a setting, instead, we included interventions that were executed in various settings, such as in health care, community, or household. Our included measure was the relative risk for infection.

We excluded interventions that compared different types of face masks to each other (in which the comparison group were assigned to use a face mask). We did not exclude any studies based on age and gender or have exclusion criteria based on sample sizes or follow-up periods. We included all the studies with a whole text available (including pre-prints) while we excluded the studies which had only an abstract available. Table A1 in Supplement A provides a detailed summary of the inclusion and exclusion criteria.

Two authors (HMO and LTL) executed the search. The authors (HMO and LTL) independently

reviewed all the titles and abstracts to define the papers that could potentially be included in the systematic review. After this, both authors independently screened the articles and determined whether they met the inclusion and exclusion criteria. The disagreements between the two authors were resolved by discussion.

### 2.3 DATA EXTRACTION

Two authors (HMO and LTL) independently extracted the data which included (1) study setting (time, country, population); (2) intervention details (randomization level, follow-up, type of mask, other interventions, case or index case definition); (3) outcome measures (effect size or N per group); (4) compliance measure; and (5) study results for the effects of face mask use. Two other reviewers (JK and RS) checked the extracted data for errors.

### 2.4 RISK-OF-BIAS ASSESSMENT

Two review authors (HMO and LTL) independently assessed the risk of bias using the Cochrane Risk of Bias tool.[32] Any discrepancies or unusual patterns were resolved by consensus. The following characteristics were evaluated: Random sequence generation, allocation concealment (selection bias), blinding of participants and personnel (performance bias), blinding of outcome assessment (detection bias), incomplete outcome data (attrition bias), selective reporting (reporting bias), and non-compliance in the treatment group and control group. The risks were categorized as low risk, unclear risk or high risk of bias. Following the Cochrane tool for risk assessment, we denoted the overall risk of bias as *low* if all the categories were at a low risk of bias, *high* if at least one domain was at a high risk of bias. We denoted the overall risk of bias as *unclear* if at least one domain was at an unclear risk of bias and no domain was at a high risk.<sup>1</sup>[32]

### 2.5 DATA ANALYSIS

The results for all the outcomes were expressed as risk ratios while we used 95% confidence intervals. We combined the estimates using a random-effects meta-analysis, based on the assumption that the existence of methodological and clinical heterogeneity potentially affecting the results was likely. We estimated the between-study variance by using the DerSimonian and Laird method of moments estimator. We calculated the 95 percent confidence intervals using the Wald method.

---

<sup>1</sup>Taking the overall risk into account is important because it helps in avoiding the bias caused by prioritizing one category over others as any source of bias can be problematic.[32]

We assessed heterogeneity and quantified statistical inconsistency by using the  $\xi^2$  test and the  $I^2$  statistic, respectively.[33] We used stratified meta-analyses to explore heterogeneity in the effect estimates according to: non-compliance, study populations, and settings. We studied how non-compliance in controls (using a face mask) is associated with the intervention effects in the meta-analysis with a meta-regression.

The small study effects were studied by generating contour-enhanced funnel plots to examine the bias in the results of the meta-analysis (the tendency for intervention effects from smaller studies to differ from those estimated in larger ones, which can result from reporting biases, methodological or clinical heterogeneity or other factors).

We conducted all the analyses using the *meta*, *metafor* and *dmetar* packages in R version 4.02 and *meta* package in Stata version 16.

### 3 RESULTS

#### 3.1 SEARCH RESULTS AND STUDY CHARACTERISTICS

Our search resulted in 2,354 unique publications. After the review, we retained 17 randomized controlled trials of face mask use while 2,337 articles were excluded because they did not meet the inclusion criteria (Figure 1). Altogether, these studies included 11,601 study participants in the treatment group and 10,286 in the control group (Table 1). The duration of follow-up varied from 4 days to 19 months. The studies included a variety of environmental settings: pilgrims (3 studies), college students (2 studies), healthcare (4 studies) to household environment (7 studies). Six trials were performed in a community setting [12–16, 24]. Three included children only [20, 22, 23] and 14 trials included to both adults and children [12–19, 21, 24–28].

#### 3.2 CHARACTERISTICS OF INCLUDED STUDIES

Table 1 summarizes the characteristics of each study. The trials were carried out in eleven countries in several continents: Australia [20], China [21, 27], Denmark [16], France [25], Germany [22], Hong Kong [17, 18], Japan [26], Saudi Arabia [12, 15, 24], Thailand [23], the United States [13, 14, 19], and Vietnam [28].

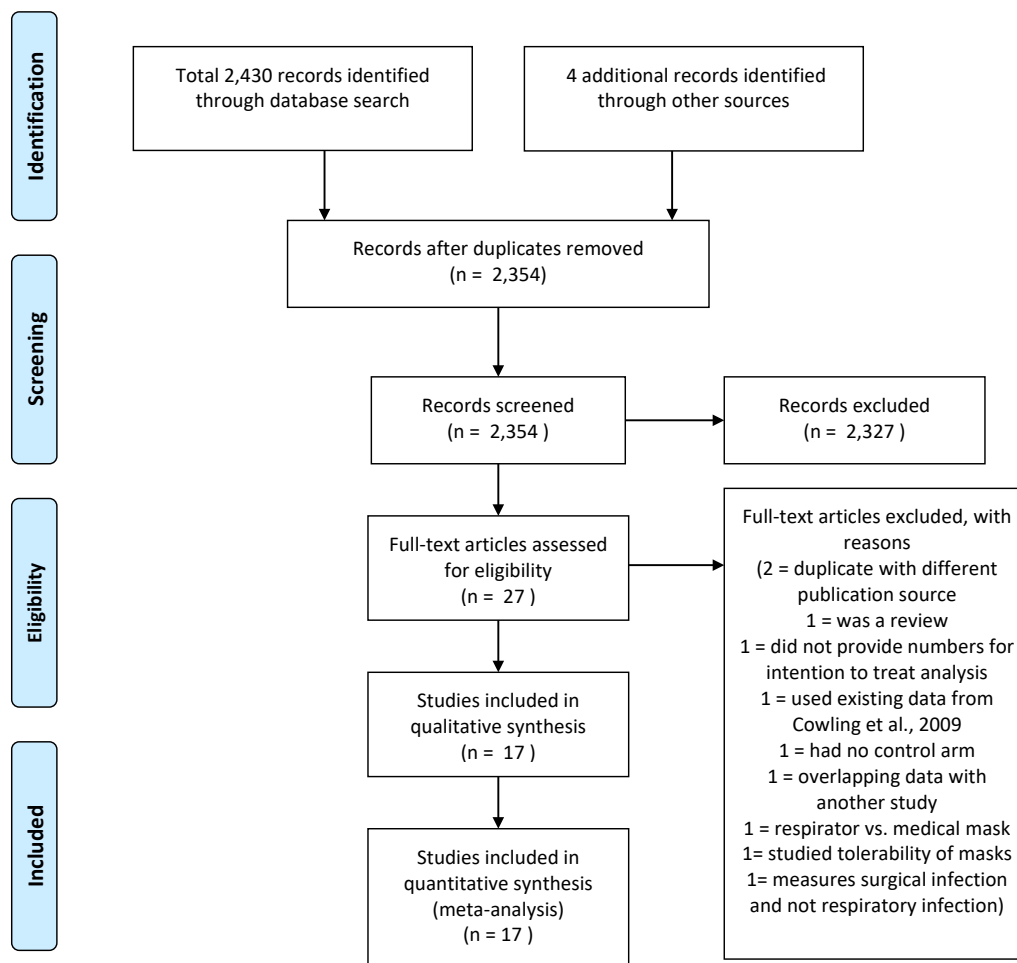

FIGURE 1: PRISMA flow diagram of included articles.

| Article                           | Year             | Setting             | Region, Country         | N                                                                                                                                  | Age                                                                                             | Randomization level                                             | Follow-up                                    | Type of mask and other interventions                                                                                                                                                                                                                                                                                                                                                                                                                                                                                                               | Disease and/or index case definition                                                                                                                                                                                                                                                                                                                                                                                                                                                                                                                                                                                                                       | Compliance                                                                                                                                                                                                                                                                                                                                                                                                                                                                                                                                                                                                                                                                                                                                                                                                                             | Main findings                                                                                                                                                                                                                        |
|-----------------------------------|------------------|---------------------|-------------------------|------------------------------------------------------------------------------------------------------------------------------------|-------------------------------------------------------------------------------------------------|-----------------------------------------------------------------|----------------------------------------------|----------------------------------------------------------------------------------------------------------------------------------------------------------------------------------------------------------------------------------------------------------------------------------------------------------------------------------------------------------------------------------------------------------------------------------------------------------------------------------------------------------------------------------------------------|------------------------------------------------------------------------------------------------------------------------------------------------------------------------------------------------------------------------------------------------------------------------------------------------------------------------------------------------------------------------------------------------------------------------------------------------------------------------------------------------------------------------------------------------------------------------------------------------------------------------------------------------------------|----------------------------------------------------------------------------------------------------------------------------------------------------------------------------------------------------------------------------------------------------------------------------------------------------------------------------------------------------------------------------------------------------------------------------------------------------------------------------------------------------------------------------------------------------------------------------------------------------------------------------------------------------------------------------------------------------------------------------------------------------------------------------------------------------------------------------------------|--------------------------------------------------------------------------------------------------------------------------------------------------------------------------------------------------------------------------------------|
| Adlin et al., 2005                | 2004             | Pilgrims            | Hill, Saudi Arabia      | Total N = 985<br>- 292 no intervention<br>- 257 health education and facemask<br>- Adults                                          | Mean age of 35.3 years<br>SD = 12.2<br>425 (43%) females with mean age 34.7 years (SD ± 13.71). | Tents                                                           | 9 days + one week (during peak for symptoms) | - Control group<br>- Control with health education: health education, hand sanitizer, and facemask<br>- Mask group: Education leaflet and facemask                                                                                                                                                                                                                                                                                                                                                                                                 | At least one of the constitutional symptoms<br>Fever, headache, myalgia, cough, sore throat, runny nose, sneezing, throat pain, cough with or without sputum, difficulty in breathing.<br>Symptoms by self-report questionnaire.                                                                                                                                                                                                                                                                                                                                                                                                                           | Wearing the mask sometimes and wearing the mask always were considered as compliance<br>33.3% of the control group used facemasks<br>51.7% of health education group used facemasks<br>81.3% of facemask group used facemask                                                                                                                                                                                                                                                                                                                                                                                                                                                                                                                                                                                                           | - Facemask use associated with treatment allocation group but not with rate of infection.                                                                                                                                            |
| Ahlojo et al., 2010               | 2008-2007        | University students | Michigan, USA           | Total N = 1437<br>- Facemask = 378<br>- Facemask and Hand hygiene = 367<br>- Adults                                                | Adults over 18 years<br>Mean age = 19.7 years<br>SD = 0.8                                       | University residence halls                                      | 6 weeks                                      | -All participants: Basic hand hygiene education, hand sanitizer, and an email video link and the study video site<br>- Facemask and hand hygiene group participants: Written materials detailing appropriate hand sanitizer and mask use<br>- Mask group: Medical procedure masks with appropriate use instructions (KIMBERLY-CLARK)<br>- Mask and hand hygiene group: Reusable plastic bags for mask storage when not in use and for disposal<br>- All participants received alcohol-based hand sanitizer (Dettol 2 oz squeeze bottle, 8 oz pump) | ILI was defined as presence of cough and at least one of the following symptoms:<br>- Fever/feverishness, chills, or body aches<br>- Phone contact with the nursing staff to assess for ILI symptoms.<br>- During scheduled participant visits, study nurses ascertained date of illness onset, temperature, use of facemasks, hand sanitizer, and hand hygiene practices (hand sanitizer, hand soap, hand towels, tissues, nasal congestion, and sore throat).                                                                                                                                                                                            | Mask compliance: Average number of mask hours per day was reported. Average number of times the hand sanitizer intervention group used the hand sanitizer was used per day in the past week and the amount used. Participants were observed for instances of hand sanitizer use. Mask only group wore their mask 3.92 hours per day versus 1.51 hours per day in the hand hygiene group. Only groups wearing their hands 5.18 times per day in the mask and hand hygiene group. The control group washed their hands on average 8.75 times per day. Mask and hand hygiene group washed their hands significantly fewer times per day than the control group from weeks 2 through 4 only. On average, the mask only group washed their hands for 23.15 seconds per day versus 20.65 seconds per day in the mask and hand hygiene group. | - Reductions in ILI during weeks 4-6 were observed in the mask and hand hygiene group.<br>- Face mask use alone associated with lower ILI in raw model but not with adjusted estimates<br>- Cumulative analyses were not significant |
| Ahlojo et al., 2012               | 2007-2008        | University students | Michigan, USA           | Total N = 1,178<br>- Control = 396<br>- Facemask = 420<br>- Facemask and hand hygiene = 362<br>- Adults                            | Adults over 18 years<br>Mean age 18.95 years<br>SD = 0.9                                        | University residence halls                                      | 6 weeks                                      | - Mask and mask with hand hygiene group: Weekly packets of mask, supplies: TECNOLTM procedure masks, Kimberly-Clark, Rowell GA<br>- Plastic bags for storage and daily disposal<br>- Facemask and hand hygiene intervention: Participants received a bottle with 62% ethyl alcohol in a gel base<br>- The control group did not receive an intervention.                                                                                                                                                                                           | Symptoms of ILI<br>- Presence of cough and at least one or more of the following symptoms:<br>- Fever/feverishness, chills, or body aches<br>- Contact information of clinical research staff for illness assessment<br>- If recorded the date of illness onset, body temperature, use of anti-pyretics, and reported symptoms.                                                                                                                                                                                                                                                                                                                            | Mask use compliance<br>Controls did not use facemasks<br>Subjects<br>- Face mask and hand hygiene group wore their mask, on average, 5.08 hours per day, mask only group 0.04 hours per day.<br>No significant differences in mask use between the two interventions was observed throughout the study.<br>- Face mask and hand hygiene group reported an average use of hand sanitizer 4.49 times per day.<br>- Mask only group reported an average use of hand sanitizer 2.93 times per day.<br>- Control group reported use of 1.51 times per day.<br>- Face mask and hand hygiene group used hand sanitizer significantly more often compared to subjects in either the mask only or control groups.                                                                                                                               | - Reduction in the rate of ILI was observed in weeks 3 through 6<br>- Cumulative results were not statistically significant                                                                                                          |
| Alkhalil et al., 2013, 2014, 2015 | 2013, 2014, 2015 | Pilgrims            | Hill, Saudi Arabia      | Total N = 381 tents and 7,687 participants<br>- Control 169 tents, 3623 participants<br>- 149 tents, 3664 participants<br>- Adults | Adults over 18 years<br>18- 95 years<br>mean 34<br>mean 34 SD = 12                              | Tents                                                           | 4 days                                       | - Mask group was provided with 50 surgical facemask; 3M™ Standard Tri-Or surgical mask; Cat No: 1816<br>- Verbal oral printed instructions.<br>- Verbal oral printed facemask usage<br>- No mask in controls                                                                                                                                                                                                                                                                                                                                       | ILI was defined as subjective (or proven) fever plus one respiratory symptom<br>- respiratory symptoms were recorded daily. Fever plus one respiratory symptom, or two or more respiratory symptoms without fever. Pilgrims from tents. Age over 18 years. The participant should be able to provide signed informed consent.<br>Excluded: Age < 18 years. Participation in another clinical trial investigating a medical intervention<br>- The exact values are not reported/unknown<br>- No mask mandate in tent during the 7 days following inclusion. Temperature over 37.8°C with cough or sore throat was used as primary clinical case-definition. | Mask use compliance<br>75% of the mask group<br>12% in the control group used masks.                                                                                                                                                                                                                                                                                                                                                                                                                                                                                                                                                                                                                                                                                                                                                   | - No conclusive evidence on facemask efficacy most likely due to poor adherence to protocol                                                                                                                                          |
| Barashved et al., 2011            | 2011             | Pilgrims            | Hill, Saudi Arabia      | Total N = 164 in 22 tents<br>- Controls 110 tents, 89 in tents<br>- Facemask 12 tents, 75 individuals<br>- Adults                  | Age over 2 15<br>Age median in control group<br>Age median in mask group<br>am 48 (range 18-80) | Tents                                                           | 7 days, 5 days recorded symptoms             | - Facemask group provided<br>- Facial surgical facemask 3M™ Standard Tri-Or surgical mask Cat No: 1816<br>- No mask in controls                                                                                                                                                                                                                                                                                                                                                                                                                    | ILI was defined as subjective (or proven) fever plus one respiratory symptom<br>- cases: Those reporting new onset of ILI<br>- contacts: Pilgrims who shared the same tent and slept in an adjacent bed within 2 meters to cases                                                                                                                                                                                                                                                                                                                                                                                                                           | Mask use compliance<br>75% of the mask group<br>12% in the control group used masks.                                                                                                                                                                                                                                                                                                                                                                                                                                                                                                                                                                                                                                                                                                                                                   | - Less contacts became symptomatic in the mask tents                                                                                                                                                                                 |
| Burggaard et al., 2020            | 2020             | Population          | Denmark                 | Total N = 6024<br>- 2994 in mask group<br>- Mask group was recommended to wear a facemask                                          | Individuals over 18 years of age                                                                | Population                                                      | 1 month                                      | - Mask group was provided 50 three-layer, disposable surgical masks with ear loops (TYPE E, EKI 14683 (Abehal), filtration rate 98%, made in China)<br>- Aged 18 years or older<br>- No current or prior symptoms or diagnosis of COVID-19<br>- Being outside the home among others for at least 3 hours per day and who did not wear masks during their daily work                                                                                                                                                                                | COVID-19 infection<br>- occurred, the study participants were interviewed with a telephone laboratory test for COVID-19 was considered an infection.                                                                                                                                                                                                                                                                                                                                                                                                                                                                                                       | Among face mask group<br>- 46% of participants were the mask as recommended, 47% predominantly as recommended<br>Control group<br>- The exact values are not reported/unknown<br>- No mask mandate in Denmark during the study suggest low non compliance in controls                                                                                                                                                                                                                                                                                                                                                                                                                                                                                                                                                                  | - No significant association with face mask use.<br>- Intention to treat analysis did not show statistically significant benefit                                                                                                     |
| Canini et al., 2010               | 2008-2009        | Household           | le de France, Aquitaine | Total N = 105 households and 306 contacts<br>- Controls N = 158<br>- am 28 SD 18 years<br>- Adults and children<br>- France        | Median age in mask arm 25 SD 16 years<br>Median age in control arm 28 SD 18 years               | Household stratified according to age of the index intervention | 7 days, 5 days                               | - Surgery masks with earloops, 3 plys, anti fog<br>- NO mask in controls                                                                                                                                                                                                                                                                                                                                                                                                                                                                           | Symptoms lasting less than 48 hours, containing temperature over 37.8°C and cough, and a positive rapid test for influenza A, index case had asthma or chronic obstructive pulmonary disease or hospitalized. Exclusion criteria: Index cases had asthma or chronic obstructive pulmonary disease or hospitalized. Exclusion criteria: Index cases who developed an ILI during the 7 days following inclusion. Temperature over 37.8°C with cough or sore throat was used as primary clinical case-definition.                                                                                                                                             | Reported low compliance<br>The index relatives reported wearing a total of 11 masks during the study. The exact values are not reported/unknown<br>The index relatives reported wearing a total of 11 masks during the study. The exact values are not reported/unknown<br>The index relatives reported wearing a total of 11 masks during the study. The exact values are not reported/unknown                                                                                                                                                                                                                                                                                                                                                                                                                                        | - Intention to treat analysis did not show statistically significant benefit                                                                                                                                                         |



|                       |            |                   |                                                                                                                                                                                                                                                                                |                                                                                                                            |                                                                      |                                                                                                      |                                                                                                                                                                                                                                                                                                                                                                                            |                                                                                                                                                                                                                                                                                                                                                                                                                                                                                                                                                                                                     |                                                                                                                                                                                                                                                                                                                                                                                                                                                                                                                                                                                                                               |                                                                                                                                                                                                                                                                                                                                                                                                                                                                                       |
|-----------------------|------------|-------------------|--------------------------------------------------------------------------------------------------------------------------------------------------------------------------------------------------------------------------------------------------------------------------------|----------------------------------------------------------------------------------------------------------------------------|----------------------------------------------------------------------|------------------------------------------------------------------------------------------------------|--------------------------------------------------------------------------------------------------------------------------------------------------------------------------------------------------------------------------------------------------------------------------------------------------------------------------------------------------------------------------------------------|-----------------------------------------------------------------------------------------------------------------------------------------------------------------------------------------------------------------------------------------------------------------------------------------------------------------------------------------------------------------------------------------------------------------------------------------------------------------------------------------------------------------------------------------------------------------------------------------------------|-------------------------------------------------------------------------------------------------------------------------------------------------------------------------------------------------------------------------------------------------------------------------------------------------------------------------------------------------------------------------------------------------------------------------------------------------------------------------------------------------------------------------------------------------------------------------------------------------------------------------------|---------------------------------------------------------------------------------------------------------------------------------------------------------------------------------------------------------------------------------------------------------------------------------------------------------------------------------------------------------------------------------------------------------------------------------------------------------------------------------------|
| Cowling et al. 2008   | 2007       | Hong Kong         | Total N = 259 households and 194 household members<br>- Control: 91 households, 213 contacts<br>- Facemask: 22 households, 61 contacts<br>- Hand hygiene: 32 households, 92 contacts<br>- Adults and children                                                                  | Index: patient age range from 2 years to over 50 years<br>- Mean 1st contact from 0 to over 50 years                       | Household                                                            | 9 days                                                                                               | - Mask group: Surgical mask<br>- No mask in controls                                                                                                                                                                                                                                                                                                                                       | <b>Face 38°C, cough, sore throat, coryza, headache, malaise, chills, fatigue</b><br>- Residents aged at least 2 years<br>- Reporting at least two symptoms of ILI<br>- Living in household with at least two other individuals<br>- No reported ILI symptoms in the preceding 14 days                                                                                                                                                                                                                                                                                                               | <b>Compliance</b><br>Over 25% household contacts in the face mask group did not wear a surgical mask at all<br>- Compliance to the face mask intervention was higher in the index subjects<br><b>Controls</b><br>Over 25% of the index cases in the control and hand hygiene intervention arms reported wearing masks at home of their own accord                                                                                                                                                                                                                                                                             | - No significant differences between intervention arms<br>- The secondary attack rates were lower than anticipated                                                                                                                                                                                                                                                                                                                                                                    |
| Cowling et al. 2009   | 2008       | Hong Kong         | Total N = 407 households and 1015 contacts<br>- Control: 91 households, 346 contacts<br>- Hand hygiene: 85 households, 325 contacts<br>- Facemask: 22 households, 61 contacts<br>- Hand hygiene: 32 households, 92 contacts<br>- Adults and children                           | Median age: 10 in control arm<br>Median age: 10 in mask arm                                                                | Household                                                            | 6 days                                                                                               | - Controls: education on healthy diet and lifestyle<br>- Hand hygiene group: instructions, liquid handsoap and hand sanitizer<br>- Mask and hand hygiene: education and demonstration of mask use, 50 surgical facemasks and 75 pediatric masks<br>- Adults and children                                                                                                                   | <b>Persons who reported at least 2 symptoms of acute respiratory illness</b><br>- Temperature higher or equal to 37.8°C, cough, headache, sore throat or myalgia<br>- Had symptom onset within 49 hours<br>- Lived in a household with at least two other individuals<br>- None of whom had reported acute respiratory illness in the preceding 14 days                                                                                                                                                                                                                                             | <b>Compliance</b><br>Intervention groups reported higher adherence to the interventions than the control group.<br>50% of index patients in the facemask, plus hand hygiene group reported regular use of a surgical mask during follow-up<br>Facemask adherence among household contacts was lower than in the hand hygiene group, but was comparable if compared with rates recommended in health-care settings but was similar to rates in previous community settings<br><b>Controls</b><br>Some contamination between groups was observed, because both interventions were practiced to some degree in the control group | - No association in the total analysis<br>- Significant reduction in RT-PCR confirmed infections where the intervention was applied with in 36 hours of symptom onset<br>- Hand hygiene and facemasks can reduce the secondary attack rate if implemented early after symptom onset in an index patient.<br>- Due to problems with adherence, effects in the study may tend toward a lower bound on the effects.<br>- The study may have over-empowered adherence for future studies. |
| Jacobs et al. 2010    | 2008       | Tokyo, Japan      | Total N = 33, one dropped out<br>- Control: 15 in control group<br>- 17 in face mask group<br>- Adults                                                                                                                                                                         | Median age in mask arm: 35 SD = 14<br>Median age in control arm: 36 SD = 9.6                                               | Hospitals by job category: nurses, doctors, and commercial personnel | 77 days                                                                                              | <b>Study arms</b><br>- Facemask group: had masks<br>- Surgical mask MA-3 (Ozu Sangyo, Tokyo, Japan)<br>- No mask in controls                                                                                                                                                                                                                                                               | <b>Modified scale to determine illness</b><br>- 8 symptoms of infection on a 4-point scale (0, none; 1, mild; 2, moderate; 3, severe; for fever: 0, absent; 1, present).<br>- Illness was a 2-day total symptom score greater than 14 (modified Jackson criteria)<br>- Exclusion criteria: self-identification of conditions predisposing to infections or taking antibiotics                                                                                                                                                                                                                       | <b>Compliance</b><br>Compliance was 84.3% in the treatment group.<br>Subjects in the no mask group refrained from wearing a face mask while on hospital property unless required to do so as part of their medical care (e.g., surgery or in the operating room).<br>Subjects' face mask use was confined only to in-hospital behavior outside of the hospital; it was not measured nor was frequency of replacing face masks.                                                                                                                                                                                                | - Face mask use in health care workers did not provide benefit in terms of cold symptoms<br>- 55% of participants were adherent with mask use<br>- Adherent mask users had a lower secondary attack rate for clinical infection                                                                                                                                                                                                                                                       |
| Larson et al. 2010    | 2008-2009  | New York, USA     | Total N = 569 households.<br>- Control (education): 211 households N = 904 (dropped 28 households)<br>- Hand sanitizer: 205 households N = 946 (dropped 10 households)<br>- Facemask and hand hygiene: 201 households N = 939 (dropped 19 households)<br>- Adults and children | The majority of index cases were over 15 years of age<br>13 years of age household contacts range from 0 to over 65 years. | Household                                                            | 19 months                                                                                            | - Hand sanitizer group: educational materials Johnson, Morris Plains, New Jersey in large (8- and 4-ounce) and small (1-ounce) containers<br>- Facemask and hand hygiene group: Procedure package for adults and children, Kimberly-Clark, Roswell, Georgia, instructions for use.<br>- Facemask and hand hygiene: 201 households N = 939 (dropped 19 households)<br>- Adults and children | <b>Infection based on symptoms</b><br>- Index cases: three per week: rhinorrhea (runny nose), sore throat, cough, muscle aches, fever, and headache.<br>When an ILI was reported, an alert was electronically sent to the project staff, who immediately contacted the reporting household, and attempted to make a home visit within 24 to 48 hours to obtain a sample for laboratory testing for influenza.<br>- Secondary case onset required within five days following the index case                                                                                                          | <b>Compliance</b><br>- 89% of index cases in the mask group reported using mask within 48h of disease onset.<br>- Those who used masks at all reported a mean of two masks per day or 111 episodes<br>- Range in cases from no mask use at all to nine masks per episode                                                                                                                                                                                                                                                                                                                                                      | - Statistically significant association between facemasks preventing respiratory infections                                                                                                                                                                                                                                                                                                                                                                                           |
| MacIntyre et al. 2009 | 2006, 2007 | Sydney, Australia | Total N = 143 households and 286 exposed adults<br>- Control: 50 families and 100 adult contacts (2 excluded)<br>- Hand sanitizer: 47 families and 84 adult contacts<br>- P2 mask: 46 families and 92 contacts<br>- Children as index patients                                 | Index case is a child between 0-15 years<br>Contact over 15 years.                                                         | Household                                                            | 5 days                                                                                               | <b>Study arms</b><br>- Surgical masks<br>- Non-fit tested P2 masks<br>- No masks in controls                                                                                                                                                                                                                                                                                               | <b>Index child had fever (temperature &gt;37.8°C) and either a cough or sore throat</b><br>The household contained >2 adults >16 years of age and 1 child 0-15 years of age<br>The child was the first and only person to become ill in the family in the household<br>- Index child was not admitted to the hospital<br>- The presence of fever (temperature >37.8°C), feeling feverish or a history of fever, >2 symptoms (sore throat, cough, sneezing, runny nose, sore eyes, sore throat, malaise), or at least two symptoms (fever, cough, sneezing) confirmed a respiratory viral infection. | <b>Compliance</b><br>- 38% of the surgical mask users used the mask most or all of the time<br>- 46% of the P2 mask group using most or all of the time<br>- Other participants were wearing face masks rarely or never<br>- Adherence dropped to 31% and 25% by day 5 of mask use                                                                                                                                                                                                                                                                                                                                            | - The intention-to-treat analysis showed no difference between arms.<br>- 55% of participants were adherent with mask use<br>- Adherent mask users had a lower secondary attack rate for clinical infection                                                                                                                                                                                                                                                                           |
| MacIntyre et al. 2011 | 2008-2009  | Beijing, China    | Total N = 1441 Healthcare workers in 15 hospitals<br>- Control group = 9<br>- Compliance control<br>- Medical mask, 5 hospitals N=492<br>- N95 non fit tested, 5 hospitals N=498<br>- N95 fit tested, 5 hospitals N=461<br>- Adults                                            | Individuals is over 18 years<br>Mean 37 medical mask<br>Mean 33 N95 non fit<br>Mean 35.3 N95 fit tested                    | Hospitals                                                            | 4+1 weeks<br>4 weeks of intervention, 1 week of non-wearing for development of respiratory symptoms. | - Medical masks: 3M™ medical mask, catalogue number 1820, St Paul, MN, USA<br>- N95 fit-tested mask: 3M™ fit-tested N95<br>- N95 non-fit-tested mask: 3M™ fit-tested N95<br>- Compliance control of group with no instructed mask use<br>Selected from other hospitals where mask wearing was not routine during the study<br>Absence of randomization in the no mask group.               | - Clinical respiratory illness: two or more respiratory or one respiratory symptom and a systemic symptom (e.g., cough, rhinorrhoea, DIC)<br>- Laboratory-confirmed viral respiratory infection                                                                                                                                                                                                                                                                                                                                                                                                     | <b>Compliance</b><br>- 63% non-fit N95<br>- 74% fit N95<br>- 76% medical masks                                                                                                                                                                                                                                                                                                                                                                                                                                                                                                                                                | - The rates of all outcomes were higher<br>- The compliance no-mask group compared to the intervention group<br>- There was no significant difference in outcomes between the N95 arms with and without fit testing.                                                                                                                                                                                                                                                                  |

| Author            | Year                | Study Design | Location         | Population                                        | Intervention                                                                                                                                                                                                                                                                                                       | Control                                                                                                                                                                                                                                                                                                            | Outcomes                                                                                                                      |                                                                                             |                                                                                                                                                                                                                                                                                                                                                                                                                                                                                                                                                                                                                                                                                                                                                                                             |                                                                                                                                                                                                                                                                                                                                                                                                                                                                                                                                                                                 |                                                                                                                                                                                                                                                                                                                                                                                                                                                                                                                                                                                                                           |                                                                                                                                                                                                                        |
|-------------------|---------------------|--------------|------------------|---------------------------------------------------|--------------------------------------------------------------------------------------------------------------------------------------------------------------------------------------------------------------------------------------------------------------------------------------------------------------------|--------------------------------------------------------------------------------------------------------------------------------------------------------------------------------------------------------------------------------------------------------------------------------------------------------------------|-------------------------------------------------------------------------------------------------------------------------------|---------------------------------------------------------------------------------------------|---------------------------------------------------------------------------------------------------------------------------------------------------------------------------------------------------------------------------------------------------------------------------------------------------------------------------------------------------------------------------------------------------------------------------------------------------------------------------------------------------------------------------------------------------------------------------------------------------------------------------------------------------------------------------------------------------------------------------------------------------------------------------------------------|---------------------------------------------------------------------------------------------------------------------------------------------------------------------------------------------------------------------------------------------------------------------------------------------------------------------------------------------------------------------------------------------------------------------------------------------------------------------------------------------------------------------------------------------------------------------------------|---------------------------------------------------------------------------------------------------------------------------------------------------------------------------------------------------------------------------------------------------------------------------------------------------------------------------------------------------------------------------------------------------------------------------------------------------------------------------------------------------------------------------------------------------------------------------------------------------------------------------|------------------------------------------------------------------------------------------------------------------------------------------------------------------------------------------------------------------------|
| MacIntyre et al.  | 2011                | Household    | Hanoi, Vietnam   | Total N = 1607 healthcare workers in 15 hospitals | - Control group (N=459)<br>- Medical mask (N=580)<br>- Adults                                                                                                                                                                                                                                                      | - Control group (N=459)<br>- Medical mask (N=580)<br>- Adults                                                                                                                                                                                                                                                      | Over 18 years of age<br>Mean 36, CI(35.6 to 37.3)                                                                             | 4-1 weeks<br>4 weeks of intervention, 1 non-wearing for development of respiratory symptoms | - Cloth mask: Cloth mask was provided<br>- Medical mask: Medical mask was provided<br>- Control group: No mask                                                                                                                                                                                                                                                                                                                                                                                                                                                                                                                                                                                                                                                                              | Clinical respiratory illness (CRI): Defined as two or more respiratory symptoms or one respiratory symptom and a systemic symptom influenza like illness (ILI) seropositive and laboratory confirmed viral respiratory infection. <b>Compliance with mask use:</b> Using the mask during the shift for 70% or more of work shift hours.<br>- Participants were categorised as compliant if the average use was equal or more than 70% of the shift hours. Contouring factors were collected at baseline.                                                                        | <b>Compliance over 70% of the time</b><br>- 56.6% of medical mask group<br>- 56.9% of the cloth mask<br>- 23.0% of the control group                                                                                                                                                                                                                                                                                                                                                                                                                                                                                      | - The rate of ILI was higher in the cloth mask arm compared with the control and medical mask group                                                                                                                    |
| MacIntyre et al.  | 2013-2014           | Household    | Beijing, China   | Total N = 245 index cases and 697 contacts        | - 122 index cases and 295 contacts in mask arm<br>- 123 index cases 302 contacts in mask arm<br>- Adults                                                                                                                                                                                                           | - 122 index cases and 295 contacts in mask arm<br>- 123 index cases 302 contacts in mask arm<br>- Adults                                                                                                                                                                                                           | Individuals over 18 years of age<br>Age mean 40.2 CI (37.6 to 42.9)                                                           | 7 days                                                                                      | - Mask group: surgical mask 3M 1817<br>- Controls: No mask                                                                                                                                                                                                                                                                                                                                                                                                                                                                                                                                                                                                                                                                                                                                  | <b>Fever ≥38°C plus one respiratory symptom including cough, nasal congestion, runny nose, sore throat or sneezes.</b> Exclusion: no respiratory symptoms prior to 14 days and who lived with at least two other people at home were recruited for the study.                                                                                                                                                                                                                                                                                                                   | <b>Compliance</b><br>35% control used facemasks<br>Facemask use was conducted to account for compliance bias                                                                                                                                                                                                                                                                                                                                                                                                                                                                                                              | - Intention to treat analysis did not show statistically significant protection with facemask use<br>- Facemask use showed association with clinical infection but not with ILI                                        |
| Shimmerman et al. | 2009-2009           | Household    | Bangkok Thailand | Total N = 442 index household members             | - 155 index patient families<br>- 302 family members in control group (5 families dropped out), 155 index patient families, 292 family members in mask arm (8 families dropped out), 155 index patient families<br>- 291 family members in Hand wash plus mask (10 families dropped out), index patients: children | - 155 index patient families<br>- 302 family members in control group (5 families dropped out), 155 index patient families, 292 family members in mask arm (8 families dropped out), 155 index patient families<br>- 291 family members in Hand wash plus mask (10 families dropped out), index patients: children | Index patient age range from 0 to 19 years                                                                                    | Up to 21 days                                                                               | - Control group: nutritional, physical activity, education and a handwashing kit, graduated dispenser with standard unscented liquid hand soap<br>- Handwashing with facemask: household handwashing education and the 50 standard paper surgical face masks and 20 Thailand #141K, 20AAMB-301N                                                                                                                                                                                                                                                                                                                                                                                                                                                                                             | <b>ILI was defined as fever ≥38°C and cough or explanation</b><br>- illness <48 hours before respiratory specimens tested positive for influenza by a rapid influenza diagnostic test (RIDT) that was later confirmed by qualitative real-time RT-PCR (qRT-PCR).<br>- Children at high risk for severe influenza complications and those treated with influenza antiviral medications<br>- Households with any member reporting an ILI that preceded the index case by 7 days or less and households where any member had received a vaccination during the preceding 12 months | <b>Compliance</b><br>- Parents used masks 36minutes per day<br>- Patients wore their masks for a median of 153 minutes per day<br>- siblings 17 minutes per day<br><b>Controls</b><br>- 17% control family members used facemasks                                                                                                                                                                                                                                                                                                                                                                                         | - No significant association with hand washing<br>- Facemask use with handwashing                                                                                                                                      |
| Suess et al.      | 2009-2010-2010-2011 | Household    | Berlin, Germany  | Total N = 218 individuals in 84 households        | - 30 control house holds and 82 contacts<br>- 28 contacts hand hygiene house holds, 67 hygiene house holds, 67 contacts<br>- Children as index patients                                                                                                                                                            | - 30 control house holds and 82 contacts<br>- 28 contacts hand hygiene house holds, 67 hygiene house holds, 67 contacts<br>- Children as index patients                                                                                                                                                            | Index cases were predominantly children under 14 years of age<br>92-100% per study arm.<br>Contacts were predominantly adults | 2 to 8 days                                                                                 | - Mask and hygiene arm: alcohol based hand-rub: Sterilmum TL, Bode Chemie, Germany<br>Surgical facemasks in two different sizes, one for children aged younger than 14 years (Child's Face Mask, Mumbert-Clark, USA) and one for adults (Mumbert-Clark, USA) and Medical Products, France)<br>- Laborscop confirmed influenza infection in a household member who developed fever (> 38.0°C), cough or sore throat during the observation period. All other secondary cases were termed as subclinical.<br>- Laborscop confirmed influenza infection in a household member who developed fever (> 38.0°C), cough or sore throat during the observation period. All other secondary cases were termed as subclinical.<br>- Occurrence of ILI was defined as fever plus cough or sore throat. | <b>Included households with an influenza positive index case</b> in the absence of further respiratory illness within the preceding 14 days. Main outcome measure was laboratory confirmed influenza infection in a household contact<br><b>Asymptomatic secondary influenza virus</b><br>- Laboratory confirmed influenza infection in a household member who developed fever (> 38.0°C), cough or sore throat during the observation period. All other secondary cases were termed as subclinical.<br>- Occurrence of ILI was defined as fever plus cough or sore throat.     | <b>Adherence measured using surveys.</b><br><b>Definition 1.</b> Daily adherence (always or mostly) after implementation of the intervention (always or mostly).<br>Daily compliance was over 50% in both M and MH.<br>Adherence to facemask use began around the sixth day of the index patients illness.<br>Definition for the adherence for hand hygiene: if they had disinfected their hands at least five times per day on each of the 5 days<br><b>Mask and hand hygiene group:</b> low hand hygiene adherence patients of the MH group dropped from 41% to 19%.<br><b>Mask group:</b> Relatively stable adherence. | - Household transmission was reduced when implemented within 36 hours<br>- Household transmission was not reduced when implemented after 36 hours<br>- Significant analysis showed significant reduction of infections |

Table 1. Descriptive table outlining study characteristics in this systematic review and meta-analysis

|                        | Blinding            |                        |                            |                    |                         |                     | Non-compliance  |               |
|------------------------|---------------------|------------------------|----------------------------|--------------------|-------------------------|---------------------|-----------------|---------------|
|                        | Sequence generation | Allocation concealment | Participants and personnel |                    | Incomplete outcome data | Selective reporting | Treatment group | Control group |
|                        |                     |                        | Outcome assessment         | Outcome assessment |                         |                     |                 |               |
| Abdin et al., 2005     | Unclear risk        | Unclear risk           | Unclear risk               | Unclear risk       | Low risk                | Low risk            | Unclear risk    | Unclear risk  |
| Aiello et al., 2010    | Unclear risk        | Low risk               | Unclear risk               | Unclear risk       | Low risk                | Low risk            | Unclear risk    | Low risk      |
| Aiello et al., 2012    | Low risk            | Low risk               | Unclear risk               | Unclear risk       | Low risk                | Low risk            | Unclear risk    | Low risk      |
| Alfelali et al., 2020  | Unclear risk        | Unclear risk           | Unclear risk               | Unclear risk       | Low risk                | Low risk            | Unclear risk    | High risk     |
| Bundgaard et al., 2020 | Low risk            | Low risk               | Unclear risk               | Unclear risk       | Low risk                | Low risk            | Unclear risk    | Low risk      |
| Barasheed et al., 2014 | Low risk            | Low risk               | Unclear risk               | Unclear risk       | Low risk                | Low risk            | Low risk        | Unclear risk  |
| Canini et al., 2010    | Low risk            | Low risk               | Low risk                   | Unclear risk       | Low risk                | Low risk            | Low risk        | Unclear risk  |
| Cowling et al., 2008   | Low risk            | Low risk               | Unclear risk               | Unclear risk       | Low risk                | Low risk            | Unclear risk    | Unclear risk  |
| Cowling et al., 2009   | Low risk            | Low risk               | Unclear risk               | Unclear risk       | Low risk                | Low risk            | Unclear risk    | Unclear risk  |
| Jacobs et al., 2009    | Low risk            | Low risk               | Unclear risk               | Unclear risk       | Low risk                | Low risk            | Low risk        | Unclear risk  |
| Larson et al., 2010    | Low risk            | Low risk               | Unclear risk               | Unclear risk       | Low risk                | Low risk            | Unclear risk    | Low risk      |
| Macintyre et al., 2009 | Low risk            | Low risk               | Low risk                   | Unclear risk       | Low risk                | Low risk            | Unclear risk    | Low risk      |
| Macintyre et al., 2011 | High risk           | Unclear risk           | Unclear risk               | Unclear risk       | Low risk                | Low risk            | Low risk        | Unclear risk  |
| Macintyre et al., 2015 | Low risk            | Unclear risk           | Unclear risk               | Unclear risk       | Low risk                | Low risk            | Low risk        | Unclear risk  |
| MacIntyre et al., 2016 | Low risk            | Low risk               | Unclear risk               | Unclear risk       | Low risk                | Low risk            | Unclear risk    | Unclear risk  |
| Suess et al., 2012     | Low risk            | Low risk               | Low risk                   | Unclear risk       | Low risk                | Low risk            | High risk       | Low risk      |
| Simmerman et al., 2011 | Low risk            | Low risk               | Low risk                   | Unclear risk       | Low risk                | Low risk            | High risk       | Unclear risk  |

FIGURE 2: Bias assessment. Non-compliance in the treatment or control group: high risk if the reported non-compliance was greater than 50%, unclear if between 30-50%, and low if under 30%.

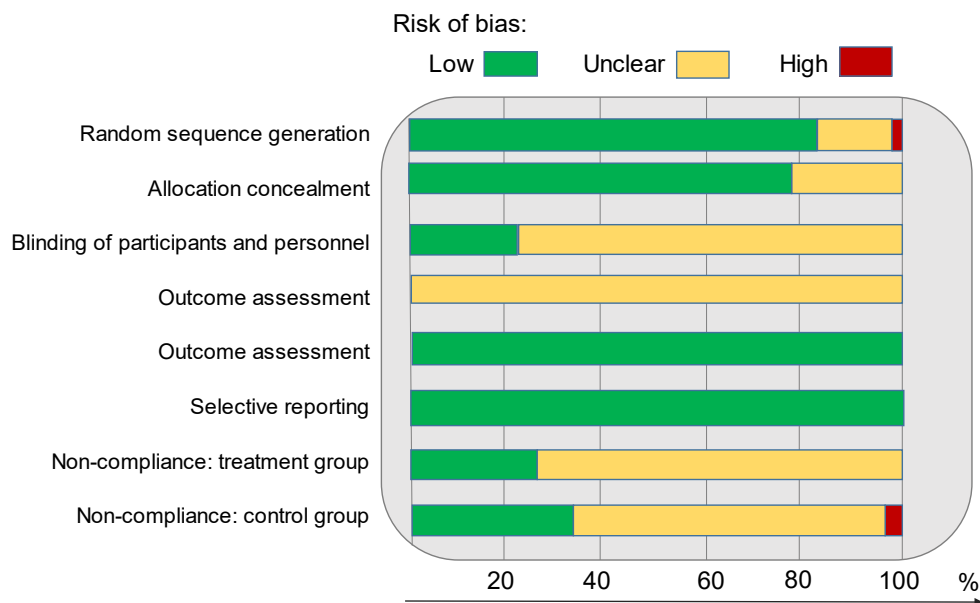

FIGURE 3: Review authors' judgments on each risk-of-bias item as percentages across all the included studies.

### 3.3 ASSESSMENT OF INTERVENTION: FACE MASK USE

In addition to conducting interventions in diverse settings (community, hospital, household) and age groups (adults, children), the interventions themselves varied. In some of the interventions, the treatment group received an education leaflet in addition to face masks [12], while, in others, the intervention included a weekly supply of face masks and a plastic bag for storage and daily disposal [15]. The type of face mask varied from cloth masks to medical masks with ear loops. In some studies, the level of information on the face mask use was unclear. Some trials had a specific hand hygiene and face mask arm [13, 14, 18, 19] in which the treatment group intervention included also a hand sanitizer.

Four studies [13, 14, 19, 24] found a protective effect of face masks in the intention-to-treat analysis. Two of these studies had a follow-up length of 6 weeks and one up to 19 months, which were the longest follow-up times among the 17 included interventions. In addition, two additional studies showed an association in the per protocol analysis [18, 34]. These studies were source protection studies where an early intervention within 36h was associated with a reduced number of respiratory infections in the contacts, suggesting that face masks may be most efficient if adopted early on during the exposure.

### 3.4 RISK OF BIAS ACROSS THE STUDIES

Figure 2 summarizes the risk of bias on the study level. The observed bias was low or unclear in the majority of the 17 randomized controlled trials. In the instances in which a bias was found, the main concerns were related to non-compliance either in the treatment (12 studies [12–23]) or in the control arm so that treated individuals did not use the mask while individuals in the control arm did use it (11 studies [12, 15, 17, 18, 21, 23–28]). Almost all the trials had an increased a risk of bias due to unclear or a lack of blinding. Obviously, blinding per mask use is challenging due to the visible nature of face mask. In addition, one study could not allocate the control arm randomly due to local health regulations, so it recruited a separate (non-randomized) control group and examined primarily differences between face masks [27]. There were some concerns due to the lack of blinding at the stage of identification of symptoms per treatment arm (13 studies [12–19, 21, 24, 26–28]). Similarly, it is unclear if the outcome assessment was blinded in any of the 17 studies (Figure 2). Details about random sequence generation and allocation concealment were unclear for some trials. A summary of the proportion of the trials that were at low, unclear, and high bias for each domain

is shown in (Figure 3). We found no evidence of a publication bias by a visual examination of funnel plots (Figure 7) or by an analysis based on Egger's tests:  $\beta = -0.08$   $se = 0.52$ ,  $p = 0.88$ .

### 3.5 FACE MASKS AND RESPIRATORY INFECTIONS

In total, there were 1,330 events among treatment arms (N total face mask = 11,601) and 1,335 events in control arms (N total controls = 10,286). A random effects meta-analysis of the results showed that, at the end of the trials. The median follow-up time was 9 days and ranged from 4 days to 19 months. There was no association in the meta-analysis across all 17 studies ( $RR = 0.9046$  [0.777 - 1.053],  $p = 0.196$ ,  $p$  fixed effect = 0.0006). However, there was a statistically significant reduction in respiratory infections in the individuals over 15 years of age ( $RR = 0.859$  [0.750–0.983],  $p = 0.027$  Figure 4), corresponding to a risk difference of  $-0.016$  [ $-0.0320$ ;  $-0.0002$ ]. These effects were relatively small, and significant between-study heterogeneity within this population remained ( $\tau^2 = 0.023$ ,  $I^2 = 53.0\%$  [13.7% – 74.4%],  $p = 0.01$ ).

Among the studies, the adjusted values were also provided in a subset of studies. In some studies, these values differed substantially from the unadjusted ones [23] or, as mentioned above, there was non-compliance in the treatment or control arm or both. For this reason, we performed a secondary analysis using adjusted odds ratios in the original articles when available. In this analysis, the overall effect in all the 17 RCTs - including in children - showed a protective effect ( $OR = 0.850$  [0.736 – 0.982]  $p = 0.0269$  Figure A1).

It is possible that individual studies bias the estimate. Therefore, we performed a meta-analysis through a leave-one-out analysis to examine if a systematic association to a given direction was observed after excluding a given study. The effect sizes were systematically at  $RR < 1$  with all the analyses. However, one of the largest studies [15] had a significant level of non-compliance in the treatment group with 49% of the controls using face masks. As shown in Figure 8, this study biases the association towards the null hypothesis. Similarly, we estimated significance of non-compliance on the finding. A subgroup meta-analysis without the studies with non-compliance of over 10% in the control group showed a protective effect of face masks (0.776 [0.717 - 0.841]  $p < 0.0001$ ). Similarly, including those studies in which controls used face masks for over 10% of the time, we observed a statistically significant difference between the studies where controls did not use masks vs. where controls used masks (meta-regression  $p=0.011$ ). Similarly, adjusting the RR estimate with a meta-regression in all the 17 RCT studies suggests a statistically significant association (RR adjusted for compliance = 0.87[0.78-0.98],  $p=0.017$ ), indicating that non-compliance has weakened

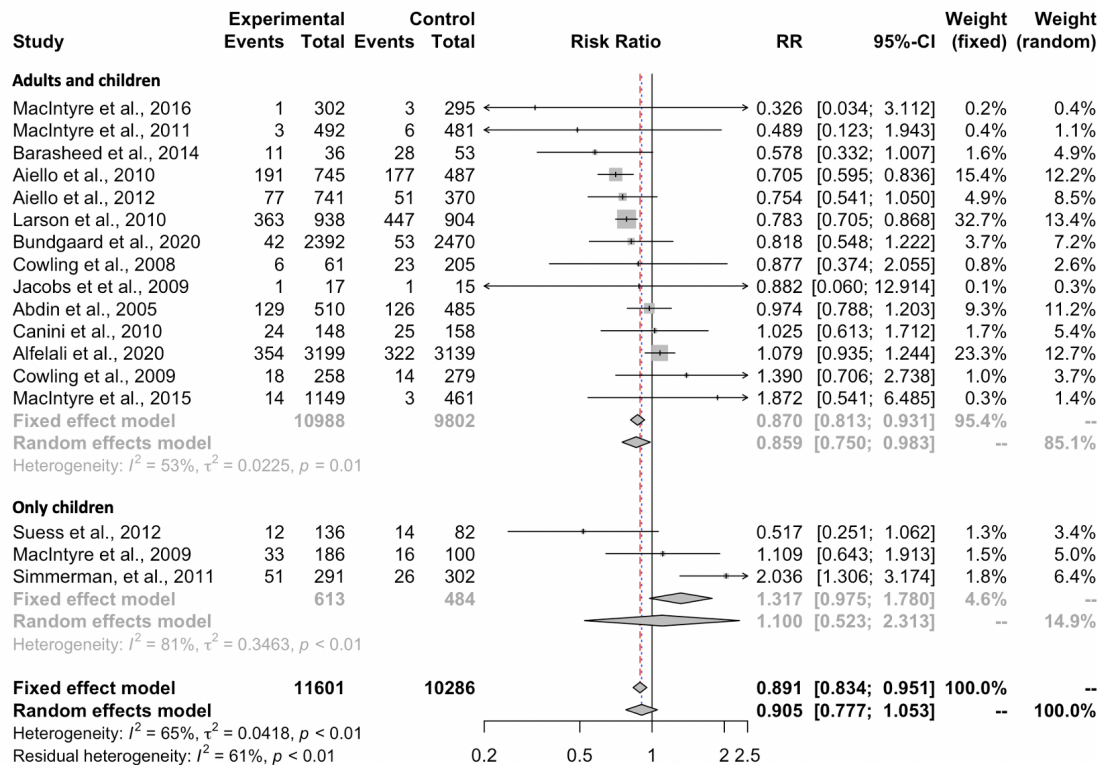

FIGURE 4: Random effects meta-analysis of the relative risk of respiratory infection, age subgroup analysis (adults and children vs. only children). The figure includes both fixed-effects and random-effect models.

the power to observe an association in these trials.

Environments differ by their risk of contracting respiratory viruses due to having varying amount of viral particles or a different length of exposure. As a result, effects of face masks likely differ by the length and the setting of the exposure. We investigated potential differences by conducting a subgroup meta-analysis of different environments: community and hospital or household settings by focusing on studies that included adults (Figure 5). In the random effects meta-analysis with the raw reported number of individuals, the result suggests an effect in the hospital or household settings ( $RR = 0.803$  [0.727 - 0.887],  $p < 0.0001$ ), while the effect was similar in the community settings although statistically insignificant ( $RR = 0.838$  [0.689 - 1.012],  $p = 0.077$ , Figure 5). It is possible that these large confidence intervals in the community setting result from non-compliance (between 10% and 50% of the control arms using masks) in three out of the six studies that assessed community transmission and from relatively low compliance in the treatment arms. In the twelve of the trials including adults, the intervention consisted solely of face mask use while in four the intervention included also guidance on appropriate hand hygiene together with the face mask use.

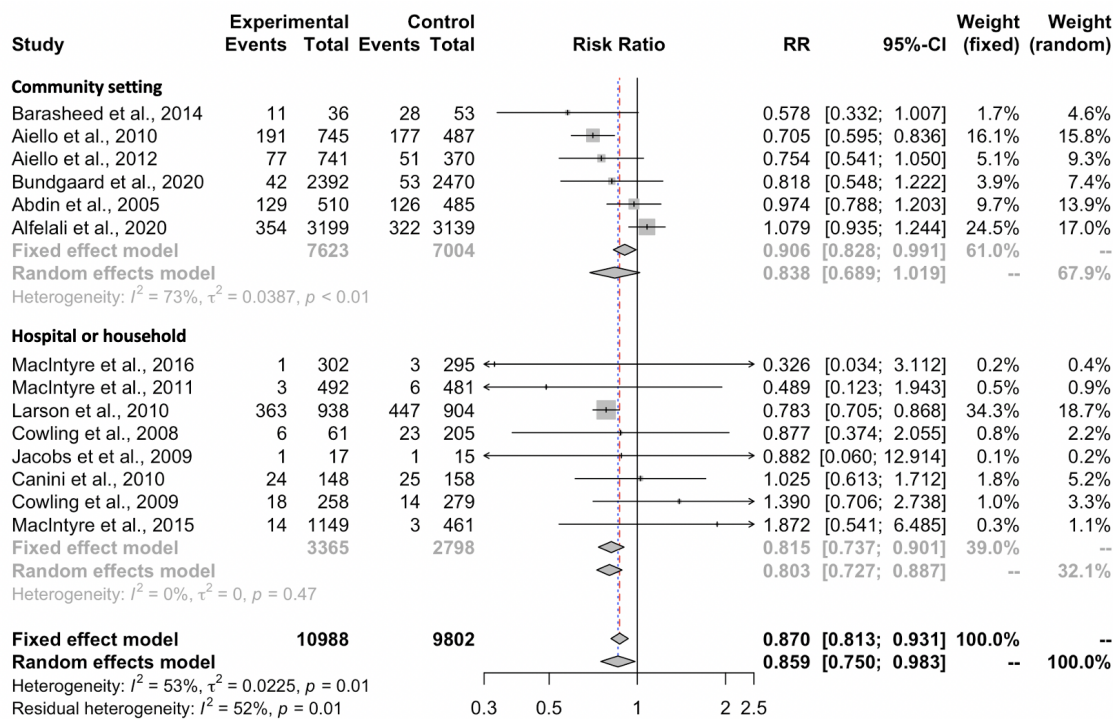

FIGURE 5: Random effects meta-analysis of the relative risk of respiratory infections, subgroup analysis by setting (community setting vs. hospital or household). The figure includes both fixed-effects and random-effect models.

The subgroup analysis for the face mask with hand hygiene guidance resulted in the strongest protection ( $RR = 0.785$  [0.695 – 0.886],  $p < 0.0001$ , ), Figure 6). In contrast, one large study where the controls used face masks 49% of the time biased the estimate towards no effect in the face mask only group ( $RR = 0.93$  [0.839 – 1.039],  $p = 0.183$  [15] included while, after exclusion,  $RR = 0.868$  [0.769 - 0.979]  $p = 0.021$ , ).



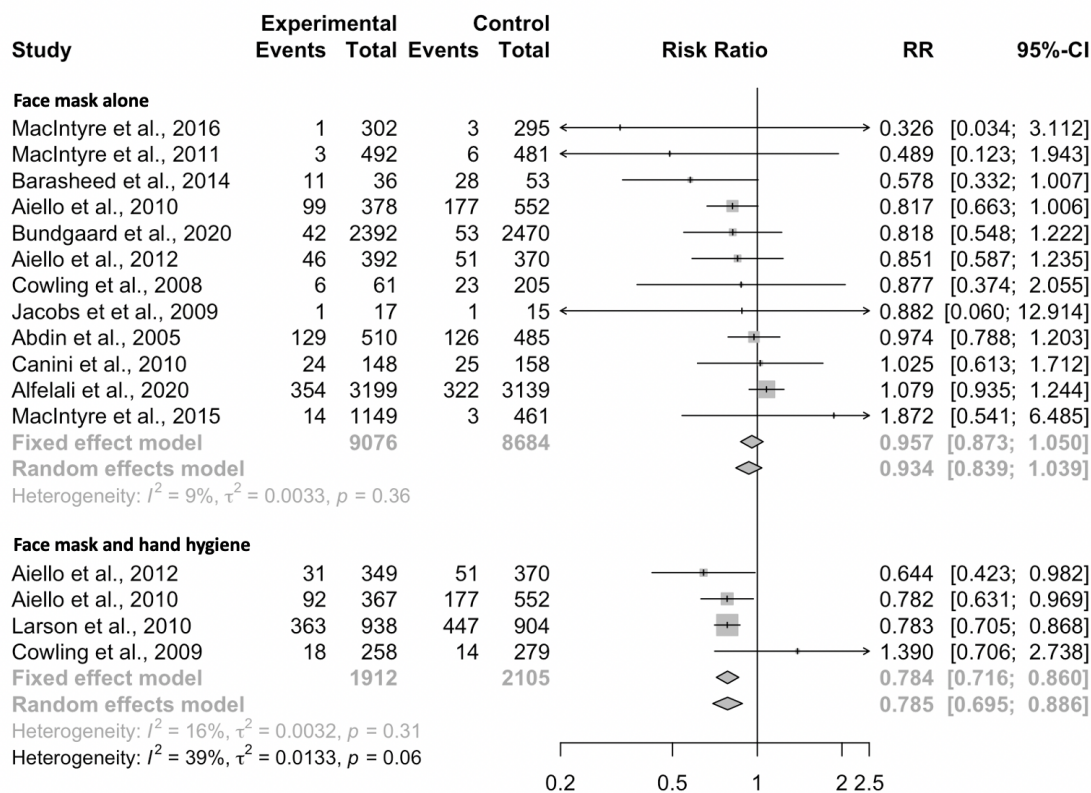

FIGURE 6: Random effects meta-analysis of the relative risk of respiratory infections, subgroup analysis taking other NPI into account (mask and hand hygiene vs. mask only). The figure includes both fixed-effects and random-effect models.



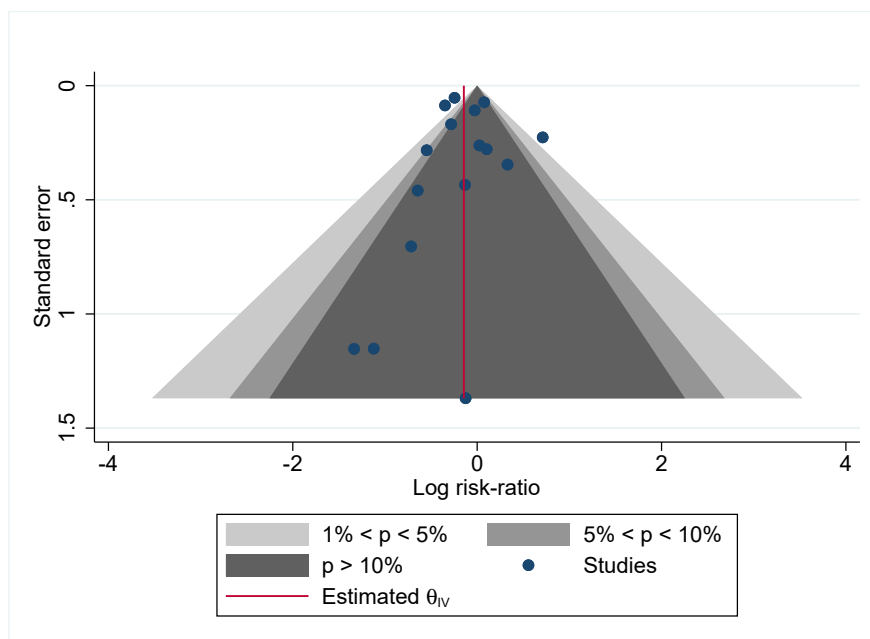

FIGURE 7: Contour enhanced funnel plot for the random effects meta-analysis of the log risk ratio of face mask use on respiratory infections.

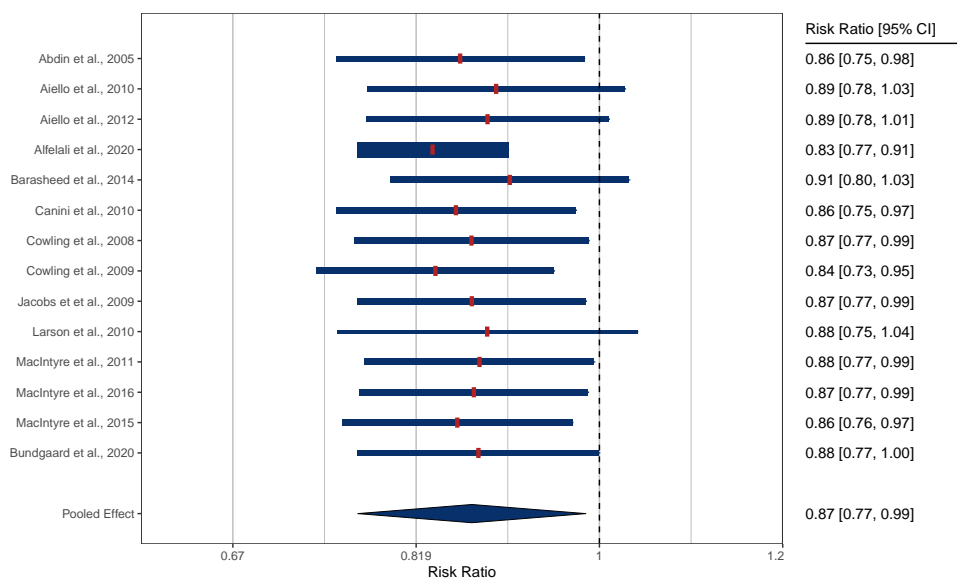

FIGURE 8: Robustness - leave one out analysis.

### 3.6 NUMBER NEEDED TO TREAT

We approximate the effect of masks on population health by exploring the number needed to treat, that is, how many individuals need to wear a mask to prevent one person from contracting a respiratory infection. The number needed to treat depends on such infections at the population level. If there are few infections, a larger number of mask users will be needed to prevent one infection. Based on the results from this meta-analysis and assuming a low baseline risk of 0.01, NNT is 455. With a larger baseline risk, 0.05, NNT is 91, and with a higher still risk, 0.2, NNT becomes 23. Similarly, the risk difference ranged from  $-3\%$  to  $0\%$  in adults ( $RD = -0.016$  [ $-0.0320 - -0.0002$ ],  $p = 0.048$ , ) and was larger with appropriate hand hygiene  $RD = -0.051$  [ $-0.116 - 0.014$ ],  $p = 0.12$ ).

## 4 DISCUSSION

### 4.1 MAIN FINDINGS

This systematic review and meta-analysis of 17 RCT studies examined whether face masks prevent respiratory infections. 4 out of 17 studies supported the use of masks in the intention-to-treat analysis. In addition, the analysis of the adjusted ORs showed a protective effect of face masks. Similarly, once the studies with non-compliance in the control groups were removed, the corresponding meta-analysis showed a protective effect of face masks. Finally, adjusting the effect estimates through a meta-regression supported the use of masks across all the 17 studies. The association was seen both with mask use alone and when masks were combined with appropriate hand hygiene. This result is aligned with the current evidence that NPIs are most efficient when used together. It is worth noting that, despite the relatively large between-study heterogeneity and small effect sizes in the individual studies, the findings did support use of face masks. Therefore, these findings together with the mounting other evidence suggest that face masks may be considered as a useful NPI for respiratory infections, including COVID-19.

### 4.2 QUALITY OF EVIDENCE

We found 17 randomized controlled trials that had assessed whether masks affect the number of respiratory infections. Other earlier studies have been conducted using case-control settings or with masks with a strong filtering capacity [7]. Earlier systematic reviews and meta-analyses have investigated, for example, the effect of face masks by combining types of studies, including RCTs,

case-control studies and cohort studies [30] or cloth masks [29] in non-health care settings. The findings from our systematic review and meta-analysis is in line with the conclusions from these earlier meta-analyses conducted in different settings. In contrast, by including as a full set of studies as possible, we are better powered in estimating the effect of a mask intervention.

While the intention-to-treat analysis yields an unbiased estimate of the efficacy of the face mask intervention, its magnitude is biased downwards relative to the actual treatment effect of face masks. While the overall quality of the earlier trials is solid, there were biasing factors across the studies, including a compliance bias either because of low compliance in the mask arm or use of face masks in the control arm. According to the sensitivity analysis, these findings may bias the estimates towards the null hypothesis.

In addition, as the effects with hand hygiene seems to be stronger than with mask use alone, someone might conclude that hand hygiene is driving the association while mere face masks do not protect from respiratory infections. Indeed, while masks have been shown to be effective in themselves, their impact and, therefore, efficacy is largest when combined with other protective measures [7]. Also in our study, the effect of masks was further accentuated when combined with complementary measures, such as improved hand hygiene [13, 14]. Furthermore, other complementary measures for disease control, such as physical distancing measures, have an impact on the spread of diseases and the number of particles in the air and, hence, also add to the effect of face masks.

Indeed, in a review [35], the estimated number needed to mask to prevent one infection ranged from three (N95 masks) to six (face masks), and the number is higher still when the infection risk is low to start with. Clearly, these NNTs are only approximations since the reproduction number  $R$  differs between viral infections. Similarly, if there are no active infections, the NNT will be infinite: no infections can be prevented as none are present in the population.

With these limitations in mind, we calculated that, for respiratory infections, the NNT might range from 23 to 455. To put this into context, let us presume that, in a metropolitan area with a population of one million, 30% of the residents use face masks. With  $NNT=455$ , this might prevent 600 respiratory infections. This effect size is comparable to the NNT of pharmaceuticals. For example, the NNT for statin, one of the most widely prescribed drugs, in primary prevention of major vascular events at low levels of a CVD risk (5-10% within 5 years) ranges from 67 to 170 and is of a similar scale to face masks [36].

We show that the studies where hand hygiene was assessed together with mask use, effects with

multiplicative protective measures were seen. Our results support use of face masks in preventing respiratory infections and, hence, the WHO guidelines that recommend the use of face masks together with physical distancing and hand hygiene in controlling the spread of COVID-19.

#### 4.3 LIMITATIONS

First of all, the population studied here had residual heterogeneity. Indeed, as respiratory infections are time- and exposure-dependent, it is possible that differences in follow-up times and in symptom assessments (ILI, respiratory illness or COVID-19) have affected the power to detect associations. Second, while all the studies reported the numbers in the treatment and control arms, we did not have access to raw data and could not adjust the analysis by within-study variables. As a work-around, we performed a meta-analysis including within-study adjusted odds ratios. However, this method comes with limitations of its own as because, in practice, no studies have exactly the same covariate definitions, which bias the estimates. Third, the mask types and instructions for mask use together with follow-up times varied by study, which likely increases between-study heterogeneity. We accounted for the biases through subgroup analysis by age group, setting and non-compliance in controls and meta-regression by non-compliance in controls.

#### 4.4 CONCLUSIONS AND FUTURE IMPLICATIONS

Our meta-analysis using 17 randomized controlled trials across different exposure settings and age groups provides support for the public health policy of face mask use to limit the spread of infectious respiratory diseases, such as COVID-19. Our analysis suggests that face masks can decrease the probability of contracting a respiratory infection and can be particularly useful when combined with other personal protection methods.

Recommendations and clear communication about the benefits of face masks should be given by policymakers to limit the number of respiratory infections and, ultimately, deaths in respiratory disease pandemics, thus providing time for vaccine and treatment development.

#### CONFLICT OF INTEREST

The authors declare no conflict of interest.

#### AUTHOR CONTRIBUTION

HMO and LTL conceived the study and conducted the main analysis. JK, MP, RS and AR assisted with the analyses and drafted the initial manuscript with HMO and LTL. All the authors participated in the interpretation, contributed to the drafts of the manuscript, and approved the final version. HMO and LTL are the guarantors and ensure that all the listed authors meet the authorship criteria and that no others meeting the criteria have been omitted.

#### PATIENT AND PUBLIC INVOLVEMENT

The current research was not informed by patient and public involvement because it used secondary data. Patients or the public were not involved in the design, conduct, reporting or dissemination plans of our research.

## REFERENCES

- [1] Cutler DM and Summers LH. The COVID-19 Pandemic and the \$16 Trillion Virus. *JAMA*, 324(15):1495–1496, October 2020. doi: 10.1001/jama.2020.19759.
- [2] Murray EJ. Epidemiology’s Time of Need: COVID-19 Calls for Epidemic-Related Economics. *J Econ Perspectives*, 34(4):105–20, November 2020. doi: 10.1257/jep.34.4.105.
- [3] Liu J, Liao X, and Qian S et al. Community Transmission of Severe Acute Respiratory Syndrome Coronavirus 2, Shenzhen, China, 2020. *Emerg Infect Dis*, 26(6):1320–1323, June 2020. doi: 10.3201/eid2606.200239.
- [4] Sharma SK, Mudgal SK, Panda P, Gupta P, and Aggarwal P. COVID–19: Guidance Outlines on Infection Prevention and Control for Health Care Workers. *Indian J Community Health*, 32(1):8–14, January - March 2020. doi: 10.47203/IJCH.2020.v32i01.004.
- [5] World Health Organization. Report of the WHO-China Joint Mission on Coronavirus Disease 2019 (COVID-19). <https://www.who.int/docs/default-source/coronaviruse/who-china-joint-mission-on-covid-19-final-report.pdf>, 16-24 February 2020.
- [6] van Doremalen N, Bushmaker T, and Morris DH et al. Aerosol and Surface Stability of SARS-CoV-2 as Compared with SARS-CoV-1. *N Engl J Med*, 382(16):1564–1567, 2020. doi: 10.1056/NEJMc2004973.
- [7] Chu D, Akl E, Duda S, and et al. Physical distancing, face masks, and eye protection to prevent person-to-person transmission of SARS-CoV-2 and COVID-19: a systematic review and meta-analysis. *Lancet*, 395(10242):1973–1987, 2020. doi: 10.1016/S0140-6736(20)31142-9.
- [8] Kai D, Goldstein G-P, Morgunov A, Nangalia V, and Rotkirch A. Universal Masking is Urgent in the COVID-19 Pandemic: SEIR and Agent Based Models, Empirical Validation, Policy Recommendations, 2020.
- [9] Stutt ROJH, Retkute R, Bradley M, Cilligan CA, and Colvin J. A modelling framework to assess the likely effectiveness of facemasks in combination with ‘lock-down’ in managing the COVID-19 pandemic. *Proc R Soc A*, 476(2238):20200376, 2020. doi: 10.1098/rspa.2020.0376.
- [10] Hoertel N, Blachier M, Blanco C, and et al. A stochastic agent-based model of the SARS-CoV-2 epidemic in France. *Nat Med*, 2020. doi: 10.1038/s41591-020-1001-6.

- [11] Miyazawa D and Kaneko G. Face mask wearing rate predicts country's COVID-19 death rates: with supplementary state-by-state data in the United States. *medRxiv*, 2020. doi: 10.1101/2020.06.22.20137745.
- [12] Abdin EZ, Choudhry AJ, and Al-Naji A. Effect of use of Face mask on Hajj related Acute Respiratory Infection among Hajjis from Riyadh - A Health Promotion Intervention Study. *Saudi Epidemiology Bulletin*, 12(4):27–28, January 2005.
- [13] Aiello AE, Murray GF, Perez V, and et al. Mask Use, Hand Hygiene, and Seasonal Influenza-Like Illness among Young Adults: A Randomized Intervention Trial. *J Infect Dis*, 201(4): 491–498, February 2010. doi: 10.1086/650396.
- [14] Aiello AE, Perez V, Coulborn RM, Davis BM, Uddin M, and Monto AS. Facemasks, Hand Hygiene, and Influenza among Young Adults: A Randomized Intervention Trial. *PLoS ONE*, 7(1):1–8, January 2012. doi: 10.1371/journal.pone.0029744.
- [15] Alfelali M, Haworth E., Barasheed O, and et al. Facemask against viral respiratory infections among Hajj pilgrims: A challenging cluster-randomized trial. *PLoS ONE*, 15(10):1–20, 2020. doi: 10.1371/journal.pone.0240287.
- [16] Bundgaard H, Bundgaard JS, and Raaschou-Pedersen DET. Effectiveness of Adding a Mask Recommendation to Other Public Health Measures to Prevent SARS-CoV-2 Infection in Danish Mask Wearers. *Ann Intern Med*, Forthcoming, 2020. doi: 10.7326/M20-6817.
- [17] BJ Cowling, Fung ROP, Cheng CKY, and al et. Preliminary Findings of a Randomized Trial of Non-Pharmaceutical Interventions to Prevent Influenza Transmission in Households. *PLoS ONE*, 3(5), 2008. doi: 10.1371/journal.pone.0002101.
- [18] Cowling BJ, Chan K-H, Fang VJ, and et al. Facemasks and Hand Hygiene to Prevent Influenza Transmission in Households. *Ann Intern Med*, 151(7):437–446, 2009. doi: 10.7326/0003-4819-151-7-200910060-00142.
- [19] Larson EL, Ferng Y-H, Wong-McLoughlin J, Wang S, Haber M, and Morse SS. Impact of Non-Pharmaceutical Interventions on URIs and Influenza in Crowded, Urban Households. *Public Health Rep*, 125(2):178–191, 2010. doi: 10.1177/003335491012500206.

- [20] MacIntyre CR, Cauchemez S, Dwyer DE, and et al. Face Mask Use and Control of Respiratory Virus Transmission in Households. *Emerg Infect Dis*, 15(2):233–241, February 2009. doi: 10.3201/eid1502.081167.
- [21] MacIntyre CR, Zhang Y, Chughtai AA, and et al. Cluster randomised controlled trial to examine medical mask use as source control for people with respiratory illness. *BMJ Open*, 6: 1–9, 2016. doi: 10.1136/bmjopen-2016-012330.
- [22] Suess T, Remschmidt C, Schink SB, and et al. The role of facemasks and hand hygiene in the prevention of influenza transmission in households: results from a cluster randomised trial; Berlin, Germany, 2009–2011. *BMC Infect Dis*, 12(26):1–16, 2012. doi: 10.1186/1471-2334-12-26.
- [23] Simmerman JM, Suntarattiwong P, Levy J, and et al. Findings from a household randomized controlled trial of hand washing and face masks to reduce influenza transmission in Bangkok, Thailand. *Influenza and Other Respiratory Viruses*, 5(4):256–267, 2011. doi: 10.1111/j.1750-2659.2011.00205.x.
- [24] Barasheed O, Almasri N, Badahdah A-M, and et al. Pilot Randomised Controlled Trial to Test Effectiveness of Facemasks in Preventing Influenza-like Illness Transmission among Australian Hajj Pilgrims in 2011. *Infectious Disorders - Drug Targets*, 14:110–116, March 2014. doi: 10.2174/1871526514666141021112855.
- [25] Canini L, Andréoletti L, Ferrari P, and et al. Surgical Mask to Prevent Influenza Transmission in Households: A Cluster Randomized Trial. *PLoS ONE*, 5(11):1–6, 2010. doi: 10.1371/journal.pone.0013998.
- [26] Jacobs JL, Ohde S, Takahashi O, Tokuda Y, Omata F, and Fukui T. Use of surgical face masks to reduce the incidence of the common cold among health care workers in Japan: A randomized controlled trial. *Am J Infect Control*, 37(5):417–419, 2009. doi: 10.1016/j.ajic.2008.11.002.
- [27] MacIntyre CR, Wang Q, Cauchemez S, and et al. A cluster randomized clinical trial comparing fit-tested and non-fit-tested n95 respirators to medical masks to prevent respiratory virus infection in health care workers. *Influenza and Other Respiratory Viruses*, 5(3):170–179, 2011. doi: 10.1111/j.1750-2659.2011.00198.x.



- [28] MacIntyre CR, Seale H, Dung TC, and et al. A cluster randomised trial of cloth masks compared with medical masks in healthcare workers. *BMJ Open*, 5:1–10, 2015. doi: 10.1136/bmjopen-2014-006577.
- [29] Sharma SK, Mishra M, and Mudgal SK. Efficacy of cloth face mask in prevention of novel coronavirus infection transmission: A systematic review and meta-analysis. *J Educ Health Promot*, 9(1):192–200, July 2020. doi: 10.4103/jehp.jehp\_533\_20.
- [30] Liang M, Gao L, Cheng C, and et al. Efficacy of face mask in preventing respiratory virus transmission: A systematic review and meta-analysis. *Travel Med Infect Dis*, 36, July-August 2020. doi: 10.1016/j.tmaid.2020.101751.
- [31] Moher D, Liberati A, Tetzlaff J, and Altman DG. Preferred reporting items for systematic reviews and meta-analyses: the PRISMA statement. *BMJ*, 339, 2009. doi: 10.1136/bmj.b2535.
- [32] Higgins JP, Altman DG, Gøtzsche PC, and et al. The Cochrane Collaboration’s tool for assessing risk of bias in randomised trials. *BMJ*, 343:1–9, 2011. doi: 10.1136/bmj.d5928.
- [33] Higgins JPT, Thompson SG, Deeks JJ, and Altman DG. Measuring inconsistency in meta-analyses. *BMJ*, 327(7414):557–560, 2003. doi: 10.1136/bmj.327.7414.557.
- [34] Suess T, Remschmidt C, Schink SB, and et al. Facemasks and intensified hand hygiene in a German household trial during the 2009/2010 influenza A(H1N1) pandemic: adherence and tolerability in children and adults. *Epidemiol Infect*, 139(12):1895–1901, 2011. doi: 10.1017/S0950268810003006.
- [35] Jefferson T, Foxlee R, Del Mar C, and et al. Physical interventions to interrupt or reduce the spread of respiratory viruses: systematic review. *BMJ*, 336:77–80, 2020. doi: 10.1136/bmj.39393.510347.BE.
- [36] Taylor F, Huffman MD, Macedo AF, and et al. Statins for the primary prevention of cardiovascular disease. *Cochrane Database Syst Rev.*, 2013. doi: 10.1002/14651858.CD004816.pub5.

## SUPPLEMENT

### A STUDY CRITERIA

TABLE A1: Study criteria

- 
1. Population: General population and health care personnel in risk of contracting infectious diseases.
  2. No setting restrictions were made (included all settings health care, community, and households).
  3. Intervention type: face mask (FFP1, FFP2, FFP3, cloth mask or surgical mask).
  4. Comparison group: no face mask. Exclusion of studied with comparison using a different type of face mask.
  5. Mask use could occur with or without hand hygiene or other measures (e.g. use education).
  6. Outcomes: Relative risk for infection, safety and efficacy, slowing of infection at the population, health care setting, or household level.
  6. Included: All aged and gender.
  7. Publication format. Whole text available, preprints included. Exclusion criteria; only abstract available.
  8. Language of original publication; Primary search in English. No exclusion for other languages.
  9. Sample size and follow up did not have exclusion criteria.
  11. Excluded: Studies which studied face masks to examine effect on empathy or non-respiratory illness (eg. wound infection).
  12. Excluded: Animal studies.
- 

### B SEARCH TERMS

Our literature search can be replicated using using the following protocol.

#### B.1 COCHRANE SEARCH

**Keywords** — facemasks, infection OR “face masks”. Search with i) ”facemasks, infection” resulted 47 items. Search with ii) ”face masks, infection” resulted 146 items.

- Take those results found on RCT tab (add to table for flow chart).
- Compute total number from all the searches before duplicates (add to table for flow chart)
- Remove duplicates and record their number (add to table for flow chart)
- Keep only those RCT studies that measure the respiratory infection of the person wearing the mask OR those that measure protection from respiratory infections towards others.
- Do not keep articles that measure empathy or other related traits

#### B.2 PUBMED SEARCH

**MeSH terms** — On tab *Search trial* (“Masks” [Mesh] OR “Respiratory Protective Devices” [Mesh] OR “mask” OR “facial mask”) AND (“infection” OR “Encephalitis, Viral” [Mesh] OR “Viral Load” [Mesh])

OR "Central Nervous System Viral Diseases"[Mesh] OR "Influenza, Human"[Mesh] OR "Influenza A Virus, H5N1 Subtype"[Mesh] OR "Influenza A Virus, H1N1 Subtype"[Mesh] OR "Influenza A virus"[Mesh] OR "SARS Virus"[Mesh] OR "viral infection" OR "corona virus" or "swine flu" or "MERS") OR "COVID-19" [Supplementary Concept]) AND ("Systematic review" OR "cohort study" OR "case-control" OR "Randomized Controlled Trial" [Publication Type] OR "Randomized Controlled Trials as Topic"[Mesh] OR "Controlled Clinical Trial" [Publication Type] OR "Meta-Analysis" [Publication Type] OR "Meta-Analysis as Topic"[Mesh] OR "Network Meta-Analysis"[Mesh] )

iv) Search resulted in 2,161 items (including duplicates).

- Based on abstracts of the studies from Pubmed.
- Take RCTs.
- Keep only those RCTs that measure the respiratory infection of the person wearing the mask OR those that measure protection from respiratory infections towards others.
- Do not keep articles that measure empathy or other related traits.

### B.3 WEB OF SCIENCES

**Search terms** — Facemask AND infection AND randomized controlled trials, Face mask AND infection AND randomized controlled trials

v) Search with "Facemask AND infection AND randomized controlled trials" resulted in 63 items.

vi) Search with "Face mask AND infection AND randomized controlled trials" resulted in 13 items.

## C SUPPLEMENTARY MATERIALS

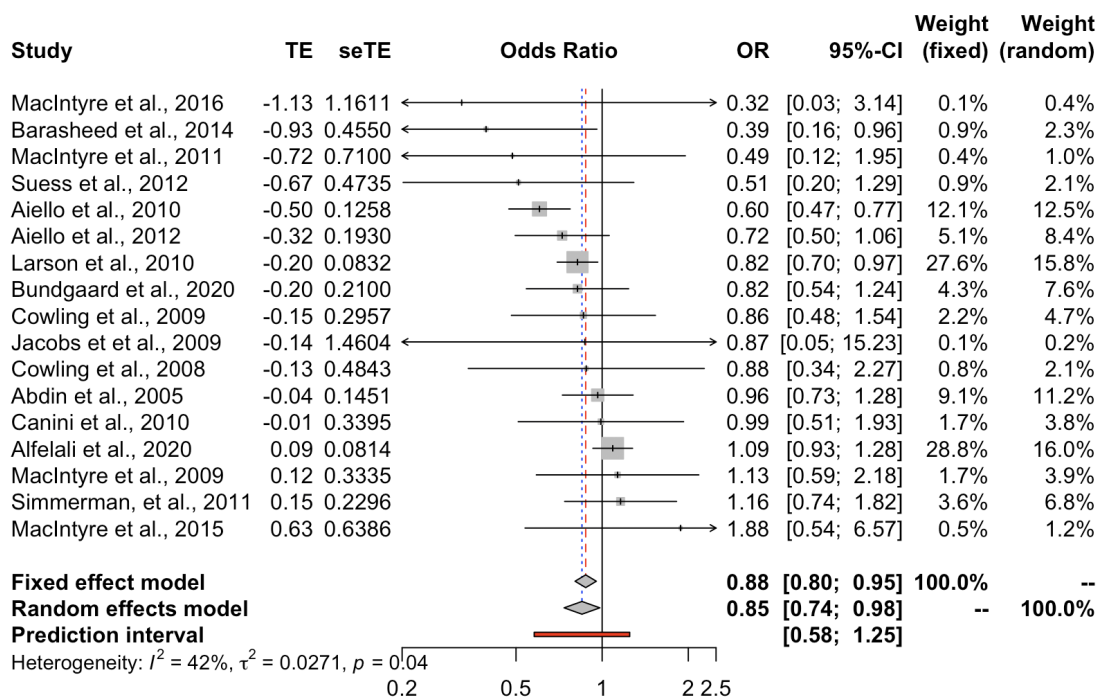

FIGURE A1: Random effects meta-analysis of the adjusted odds ratio risks of respiratory infection. The figure includes both fixed-effects and random-effect models.
